# Supplementary material for: Determination of the graphene–graphite ratio of graphene powder by Raman 2D band symmetry analysis
Source: Royal Society of Chemistry journal article supplement (doi:10.1039/c8ay02619j), 2019-01-01
Supplement: c8ay02619j1.pdf [file c8ay02619j1.pdf]

# Supplementary Information

Determination of the graphene-graphite ratio of graphene powder by  
Raman 2D band symmetry analysis

Sarah Roscher, \* René Hoffmann, and Oliver Ambacher

Fraunhofer Institute for Applied Solid State Physics, Tullastraße 72, 79108 Freiburg, Germany

\* Corresponding author

Email: [sarah.roscher@iaf.fraunhofer.de](mailto:sarah.roscher@iaf.fraunhofer.de)

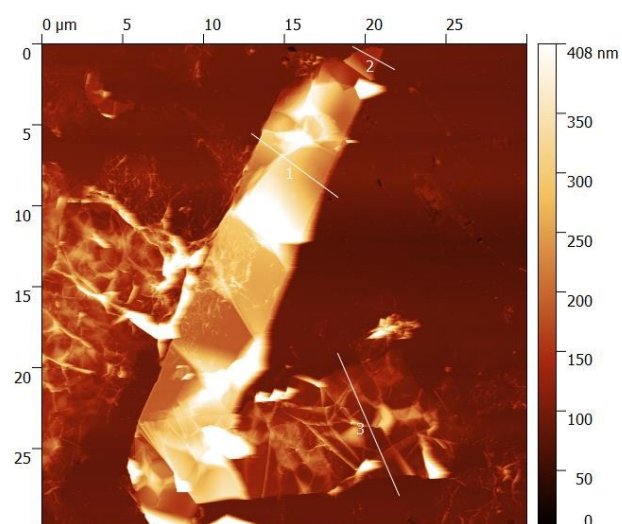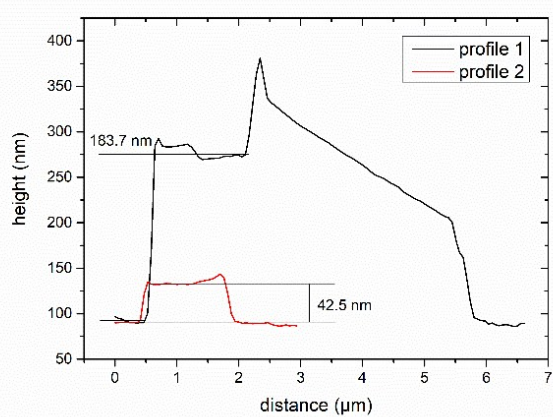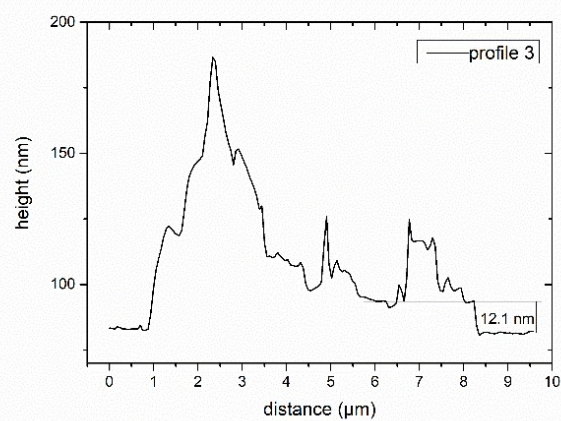

**Figure S1:** AFM height image of the graphite flakes with their respective height profiles as indicated in the image.

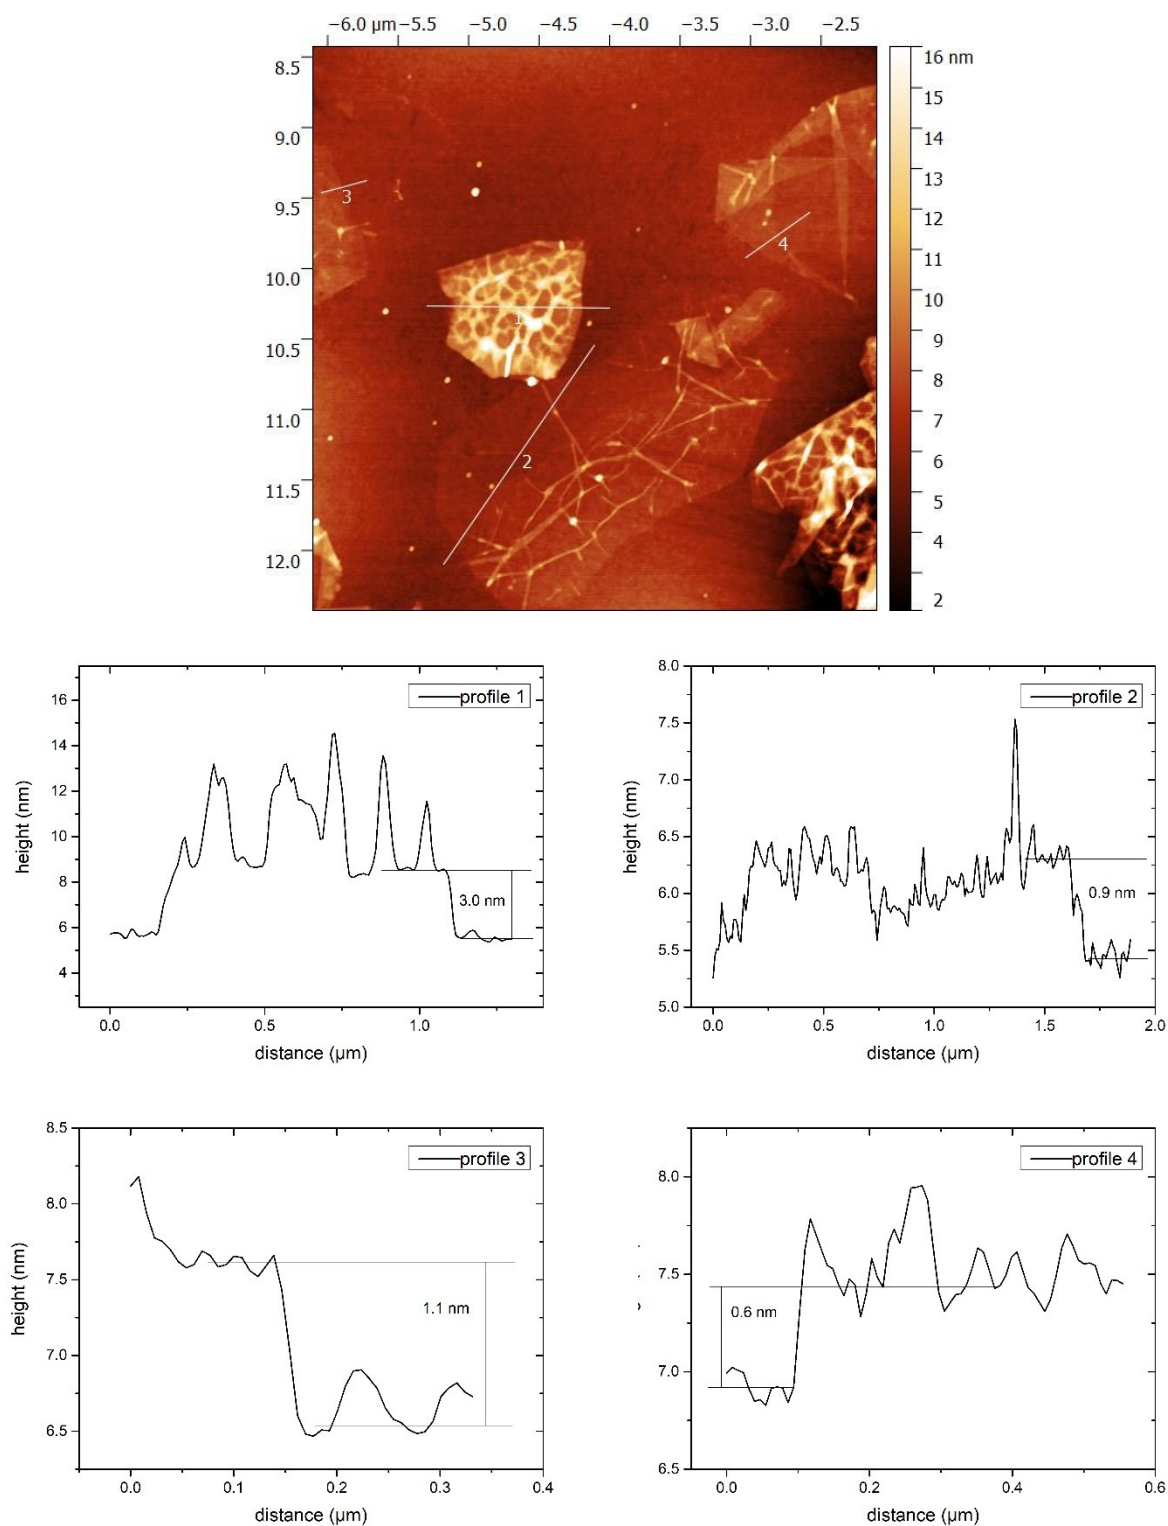

**Figure S2:** AFM height image of graphene flakes surrounding the graphite flakes shown in figure S1 and their respective profiles.

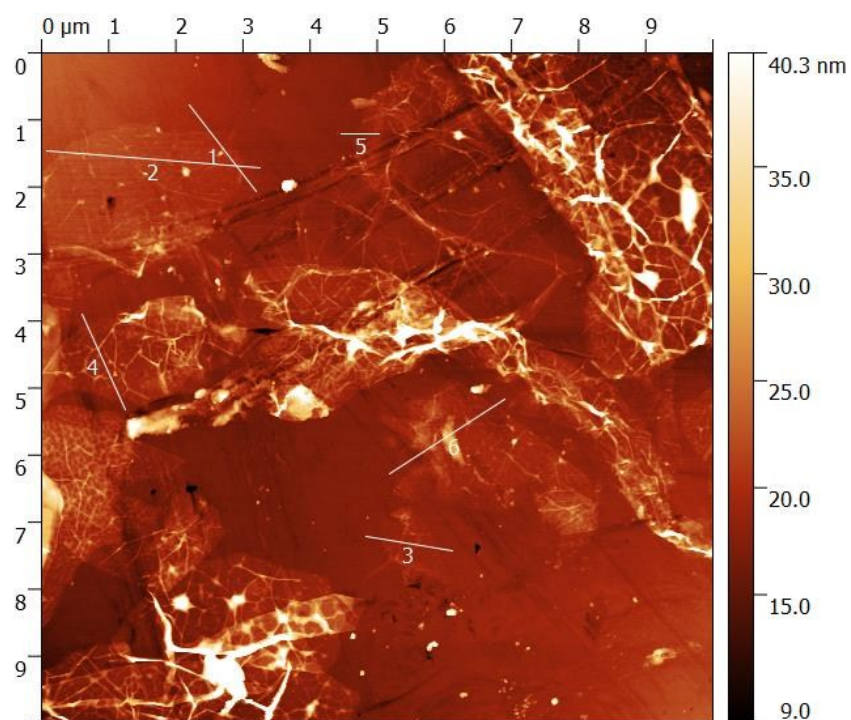

**Figure S3:** AFM height image of graphene flakes surrounding the graphite flakes. The corresponding profiles are shown in figure S4.

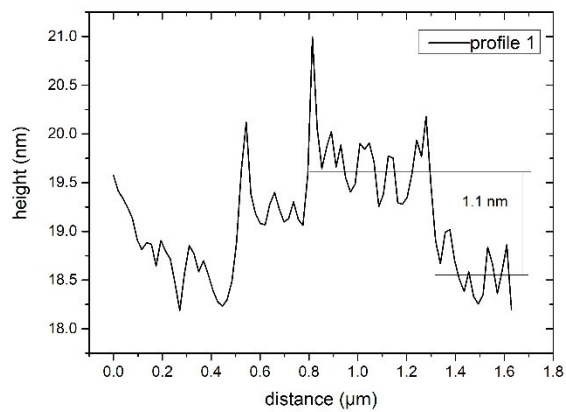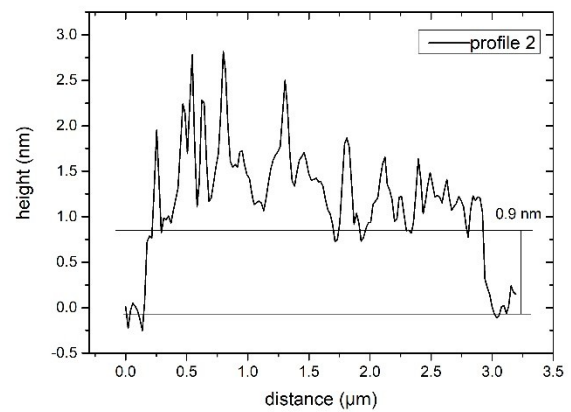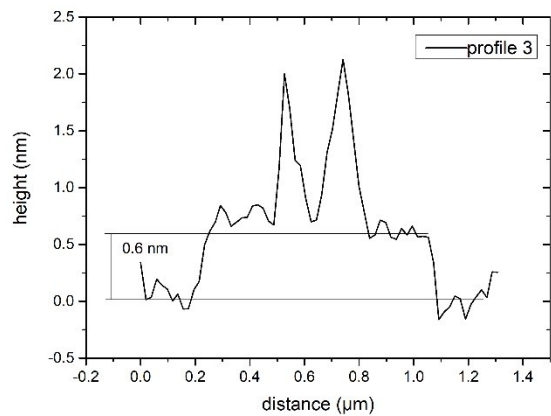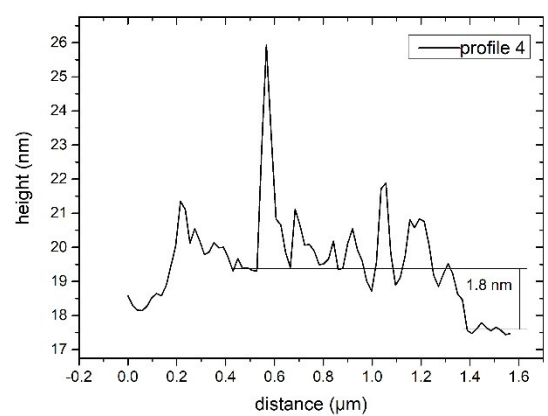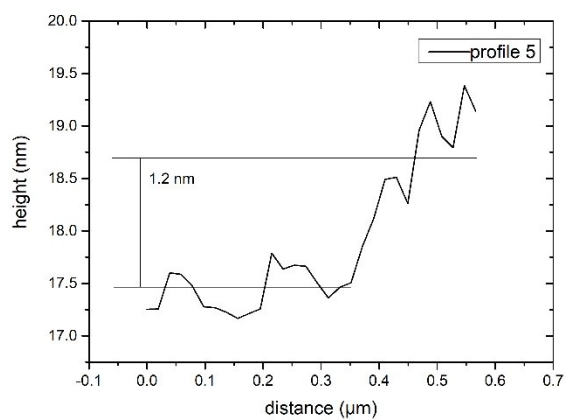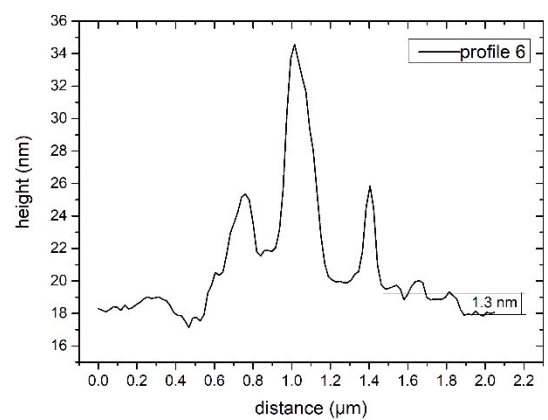

**Figure S4:** AFM height profiles of the graphene flakes as indicated in figure S3.

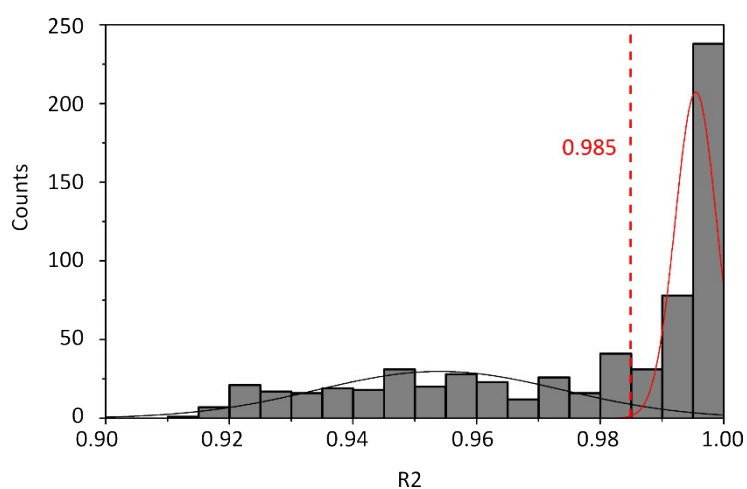

**Figure S5:** Histogram of the Raman 2D band fit coefficient  $R^2$  of the graphene and graphite flakes analysed by AFM and Raman spectroscopy shown in figure 4.

The distributions of graphene and graphite flakes were analysed by a two-sample t-test. They are significantly different with a p-value below 0.05.
